# Supplementary material
Source: publisher figshare collection journal article supplement (https://acs.figshare.com/ndownloader/files/10148268)
Supplement: Supplementary file 1 [file 10148268]

# Synthesis and luminescent modulation of ZnS crystallite by hydrothermal method

Zhiren Wei<sup>†#</sup>, Yue Lu<sup>†#</sup>, Jing Zhao<sup>†</sup>, Shuya Zhao<sup>†</sup>, Ruiqi Wang<sup>†</sup>, Nian Fu<sup>†</sup>, Xu Li<sup>†\*</sup>,  
Li Guan<sup>†\*</sup>, Feng Teng<sup>†, \*</sup>

<sup>†</sup>Hebei Key Laboratory of Photo-Electricity Information and Materials, College of Physics  
Science and Technology, Hebei University, Baoding, 071002, PR China

<sup>\*</sup> Key Laboratory of Luminescence and Optical Information, Ministry of Education, School of  
Science, Beijing Jiao Tong University, Beijing, 100044, China.

**KEYWORDS:** *Crystallite; Hydrothermal; Photoluminescence spectroscopy; Doping*

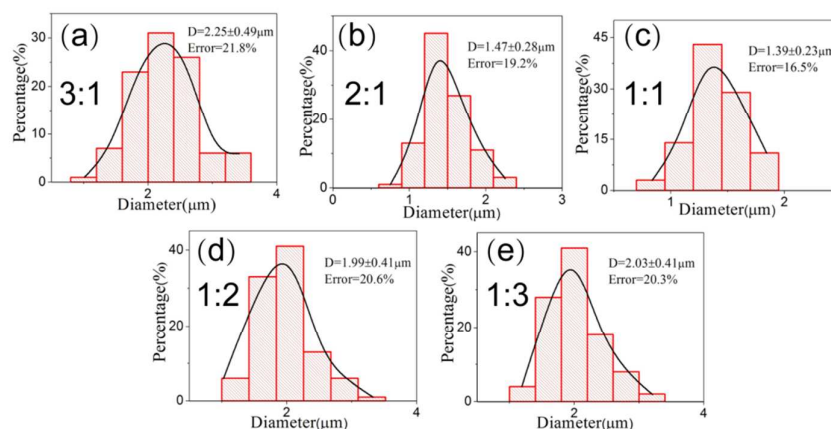

Figure S1 The histogram of diameter distribution of ZnS prepared with different ratio of water and ethanol (3:1, 2:1, 1:1, 1:2, 1:3)

From the histogram images of diameter distribution of ZnS, we could find that the distribution of size takes on normality and the diameters vary from 1.39-2.25  $\mu\text{m}$ . The average particles size is about 1.39  $\mu\text{m}$  when the W/E is 1, which is the minimum in the five samples.

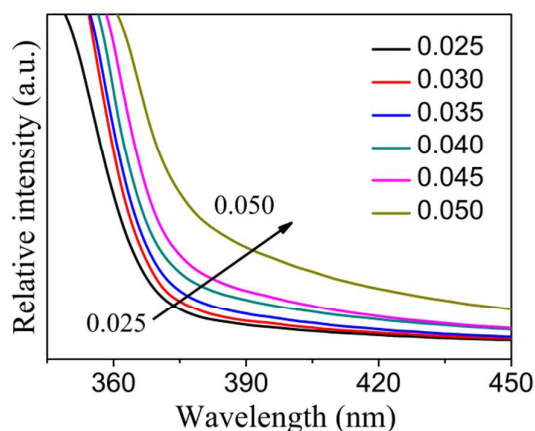

Figure S2 The absorption spectra of  $\text{ZnS}:\text{xEu}^{3+}$  ( $\text{x}=0.025, 0.030, 0.035, 0.040, 0.045, 0.050$ ) crystallite

The absorption spectra of  $\text{ZnS}:\text{xEu}^{3+}$  ( $\text{x}=0.025, 0.030, 0.035, 0.040, 0.045, 0.050$ ) crystallite are shown in figure S2. It could be find that the absorption region is before 390 nm and this is a red shift as a result of the increase of  $\text{Eu}^{3+}$  doped concentration.
